# Supplementary material for: Carbon Nanotube–Polyurethane Composite Sheets for Flexible Thermoelectric Materials
Source: PubMed Central journal article supplement (PMC10580240; doi:10.1021/acsanm.3c03247), 2023-09-19
Supplement: an3c03247_si_001.pdf [file an3c03247_si_001.pdf]

## Supporting Information

# Carbon Nanotube-Polyurethane Composite Sheets for Flexible Thermoelectric Materials

**Antonio J. Paleo<sup>1</sup>, Yadienka Martinez-Rubi<sup>2\*</sup>, Beate Krause<sup>3</sup>, Petra Pötschke<sup>3</sup>, Michael B. Jakubinek<sup>2</sup>, Behnam Ashrafi<sup>4</sup> and Christopher Kingston<sup>2</sup>**

<sup>1</sup>2C2T-Centre for Textile Science and Technology, University of Minho, 4800-058 Guimarães, Portugal

<sup>2</sup>Security and Disruptive Technologies Research Centre, National Research Council Canada, Ottawa, Ontario K1A 0R6, Canada

<sup>3</sup>Leibniz-Institut für Polymerforschung Dresden e.V. (IPF), Hohe Str. 6, 01069 Dresden, Germany

<sup>4</sup>Aerospace Research Centre, National Research Council Canada, 5145 Decelles Avenue, Montreal, Quebec H3T 2B2, Canada

\*Yadienka.Martinez-Rubi@nrc-cnrc.gc.ca

## 2.2 Preparation of SWCNT BP and nonwoven SWCNT-TPU composite sheets

By using a 50/50 ratio of solvent/nonsolvent (equal volumes of the solvent and nonsolvent), TPU that was initially dissolved in acetone is adsorbed onto the surface of SWCNTs upon combination with the non-solvent (methanol), and forms a TPU coating on the nanotubes. The composition (i.e., SWCNT and TPU content) was evaluated by weighing the dried sheets to determine the amount of TPU adsorbed/deposited on the known initial mass of SWCNTs. The external volume of the samples was evaluated by cutting squares of 15 cm × 15 mm from the SWCNT-TPU sheets. The thickness was measured with a Marathon Digital Electronic Micrometer having a resolution of 0.001 mm. The volume fraction of SWCNTs ( $V_{f,CNT}$ ), TPU ( $V_{f,TPU}$ ) and pores/voids ( $V_{f,voids}$ ) in the samples were estimated using equations 1-3:

$$V_{f,CNT} = \frac{\rho_{Comp}}{\rho_{CNT}} W_{f,CNT}, \quad (1)$$

$$V_{f,TPU} = \frac{\rho_{Comp}}{\rho_{TPU}} W_{f,TPU}, \quad (2)$$

$$V_{f,voids} = 1 - V_{f,TPU} - V_{f,CNT}, \quad (3)$$

Where  $\rho_{Comp}$ ,  $\rho_{CNT}$  and  $\rho_{TPU}$  are the densities of the nanocomposite sheet, SWCNTs, TPU, respectively.  $\rho_{Comp}$  was obtained by dividing the mass of the SWCNT-TPU sheets by their external volume, while a literature value of 1.8 g cm<sup>-3</sup> value was used for  $\rho_{CNT}$  [1].  $W_{f,CNT}$  and  $W_{f,TPU}$  correspond to the weight fraction of SWCNTs and TPU in the SWCNT-TPU composite sheets, respectively.

### 3.1 Morphological analysis of SWCNT BP and nonwoven SWCNT-TPU composite sheets

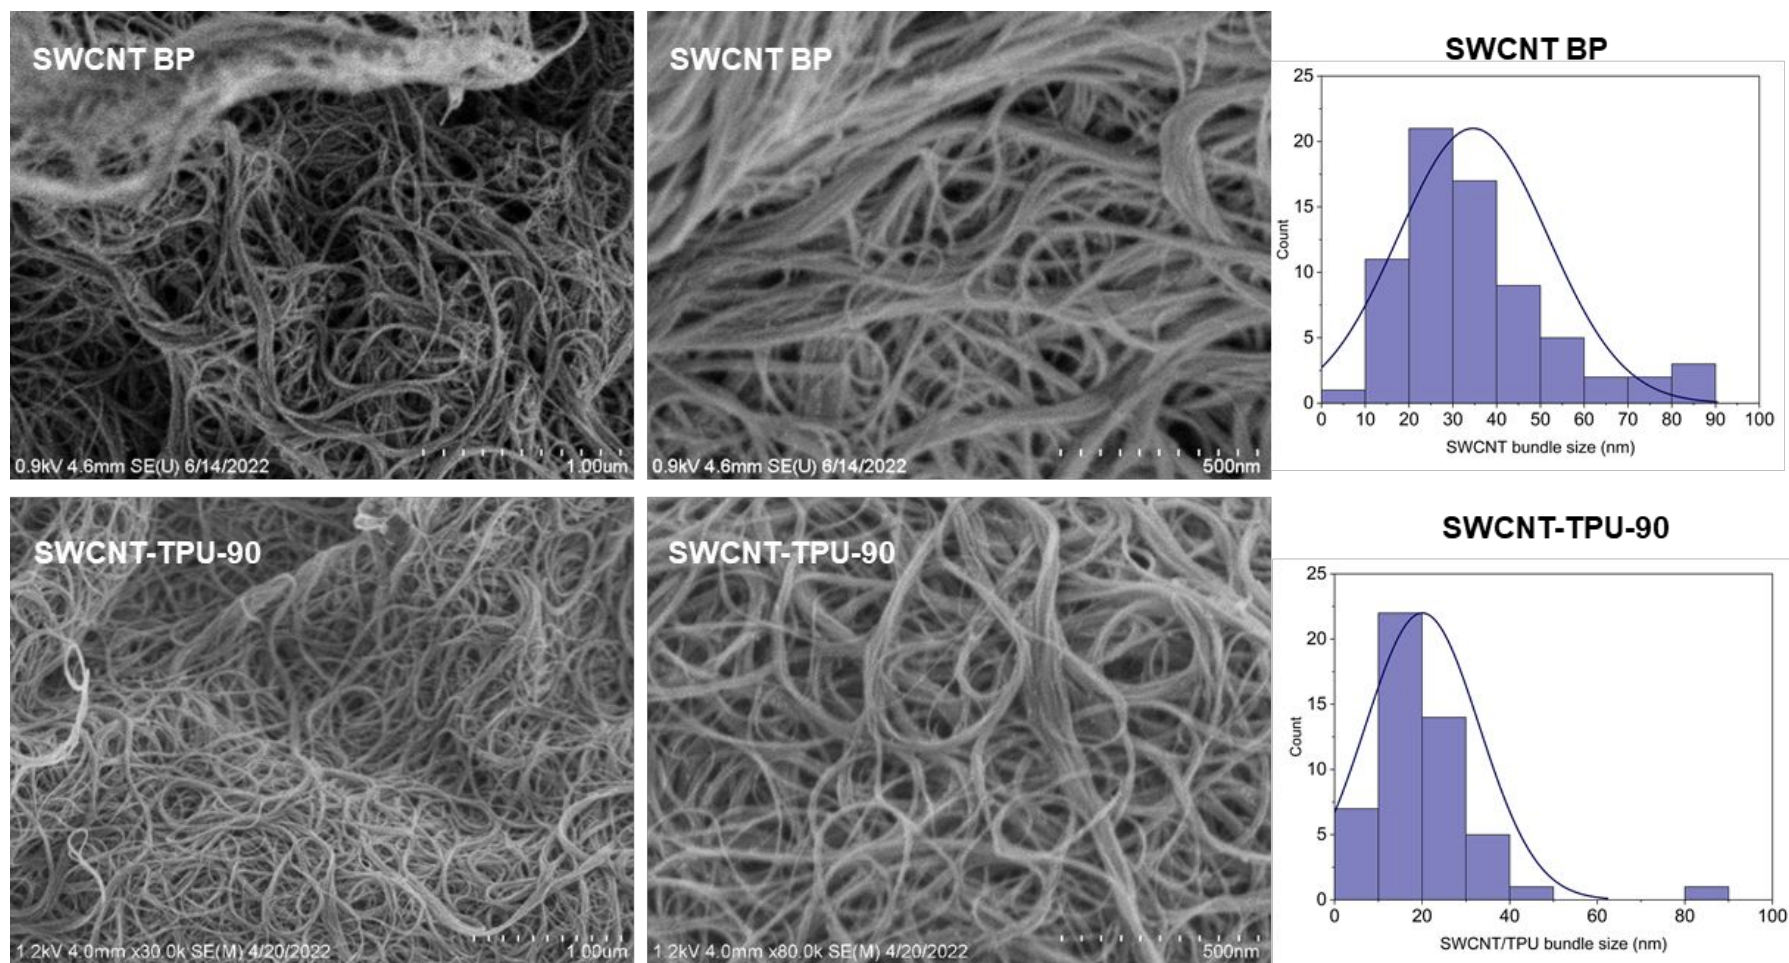

**Figure S1a.** SEM images of the surface of SWCNT BP and nonwoven SWCNT-TPU-90 composite sheet and corresponding diameter size histograms of SWCNT and SWCNT/TPU bundles

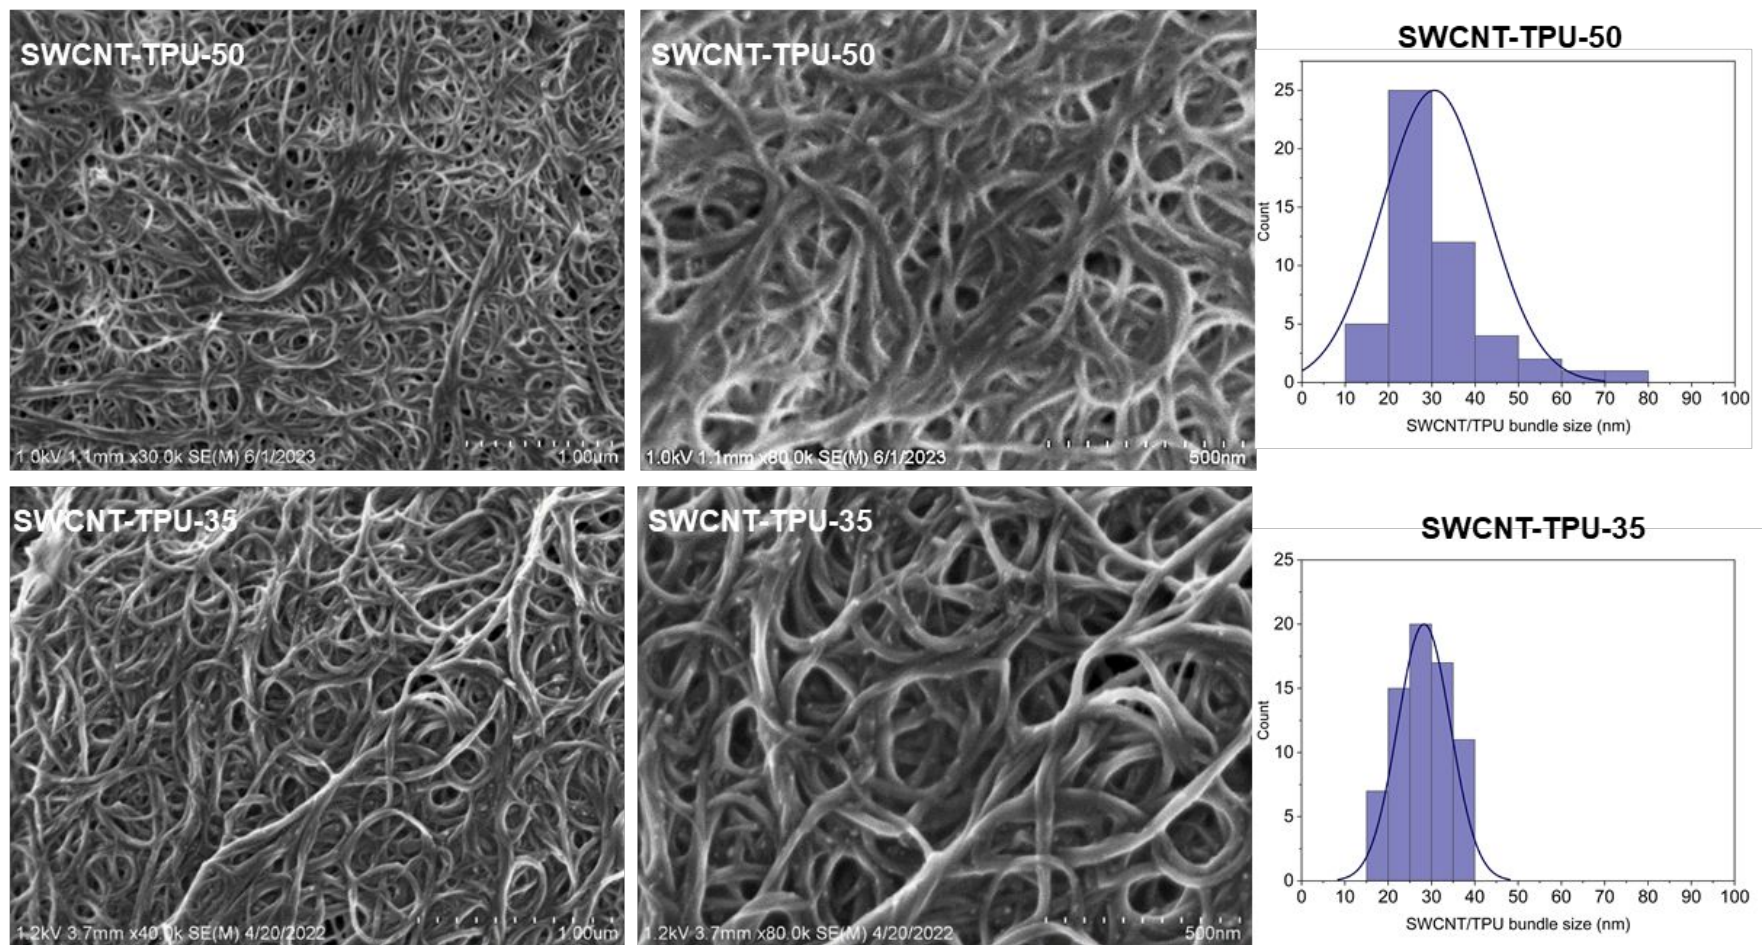

**Figure S1b.** SEM images of the surface of nonwoven SWCNT-TPU composite sheets with different SWCNT contents and corresponding diameter size histograms of SWCNT/TPU bundles

### 3.3 Thermal conductivity

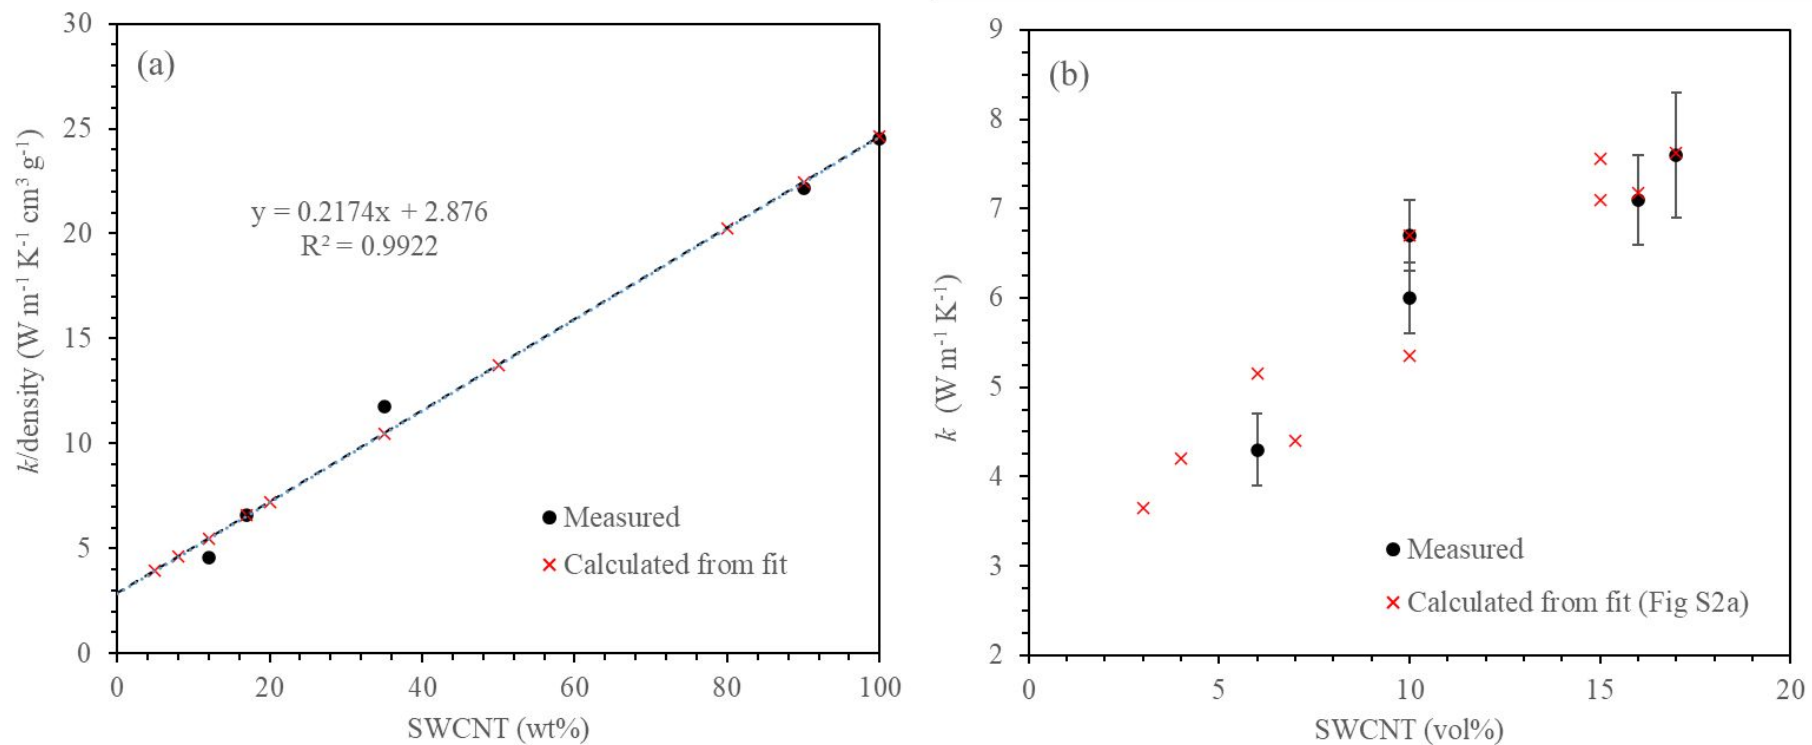

**Figure S2.** (a) Thermal conductivity ( $k$ ) normalized to density and (b)  $k$  of the composite samples as a function of vol % SWCNTs including measured datapoints (per Figure 4 in the main text) and estimated data from the linear fit.

### 3.4 Thermoelectric properties of SWCNT BP and nonwoven SWCNT-TPU composite sheets

**Table S1.** Electrical conductivity  $\sigma$ , Seebeck coefficient  $S$ , power factor PF, thermal conductivity  $k$ , and figure of merit ZT at 40 °C of the investigated samples.

| Sample       | $\sigma$<br>(S cm <sup>-1</sup> ) | $S$<br>( $\mu$ V K <sup>-1</sup> ) | Average PF<br>( $\mu$ W m <sup>-1</sup> ·K <sup>-2</sup> ) | $k$<br>(W m <sup>-1</sup> K <sup>-1</sup> ) | Average ZT<br>(-)       |
|--------------|-----------------------------------|------------------------------------|------------------------------------------------------------|---------------------------------------------|-------------------------|
| SWCNT BP     | 276 ± 33                          | 44.1 ± 2.3                         | 53.7                                                       | 7.6 ± 0.7                                   | 2.2 × 10 <sup>-3</sup>  |
| SWCNT-TPU-90 | 157 ± 17                          | 64.5 ± 0.3                         | 65.4                                                       | 7.1 ± 0.5                                   | 2.9 × 10 <sup>-3</sup>  |
| SWCNT-TPU-80 | 105 ± 5                           | 65.5 ± 0.5                         | 45.0                                                       | *                                           | 2.0 × 10 <sup>-3</sup>  |
| SWCNT-TPU-50 | 133 ± 61                          | 65.5 ± 1.3                         | 56.9                                                       | *                                           | 2.4 × 10 <sup>-3</sup>  |
| SWCNT-TPU-35 | 27 ± 10                           | 70.9 ± 2.3                         | 13.8                                                       | 6.0 ± 0.4                                   | 0.7 × 10 <sup>-3</sup>  |
| SWCNT-TPU-20 | 21 ± 3                            | 72.3 ± 0.4                         | 10.9                                                       | *                                           | 0.8 × 10 <sup>-3</sup>  |
| SWCNT-TPU-17 | 27 ± 4                            | 75.6 ± 0.7                         | 15.2                                                       | 6.7 ± 0.4                                   | 0.7 × 10 <sup>-3</sup>  |
| SWCNT-TPU-12 | 13 ± 1                            | 74.4 ± 0.0                         | 7.2                                                        | 4.3 ± 0.4                                   | 0.5 × 10 <sup>-3</sup>  |
| SWCNT-TPU-8  | 3.8 ± 2.9                         | 75.5 ± 0.9                         | 2.2                                                        | *                                           | 0.2 × 10 <sup>-3</sup>  |
| SWCNT-TPU-5  | 1.2 ± 0.5                         | 75.7 ± 0.1                         | 0.7                                                        | *                                           | 0.06 × 10 <sup>-3</sup> |

\*For these composites, the thermal conductivity value was not measured, instead an interpolated value based on Figure S2b was used. Given the modest variation in  $k$ , this is not expected to have a major effect on the estimated ZT values and trends.

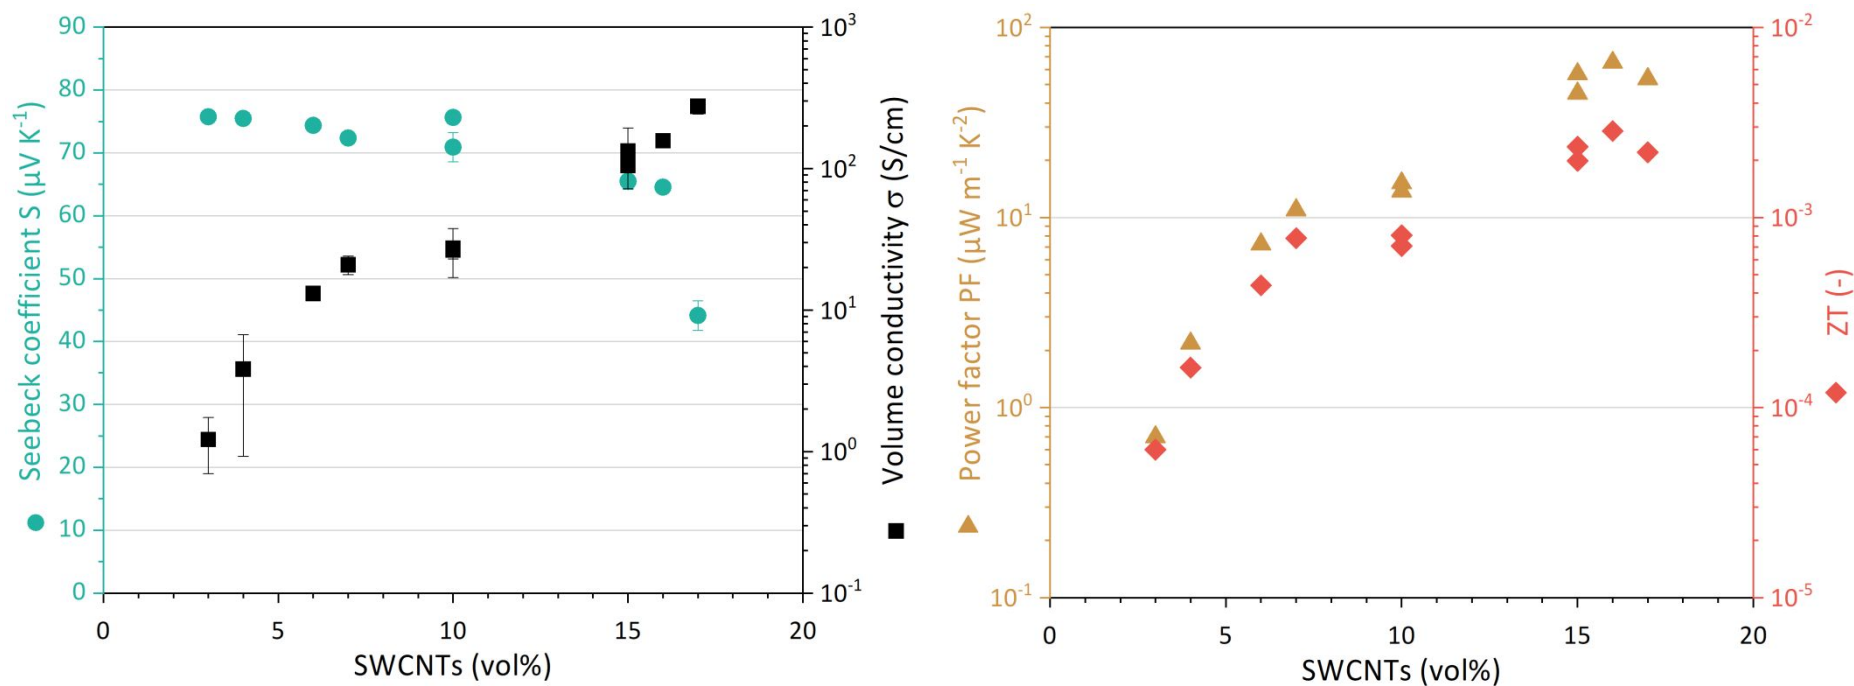

**Figure S3.** Thermoelectric properties of nonwoven SWCNT-TPU composite sheets and SWCNT BP as a function of the SWCNT vol %

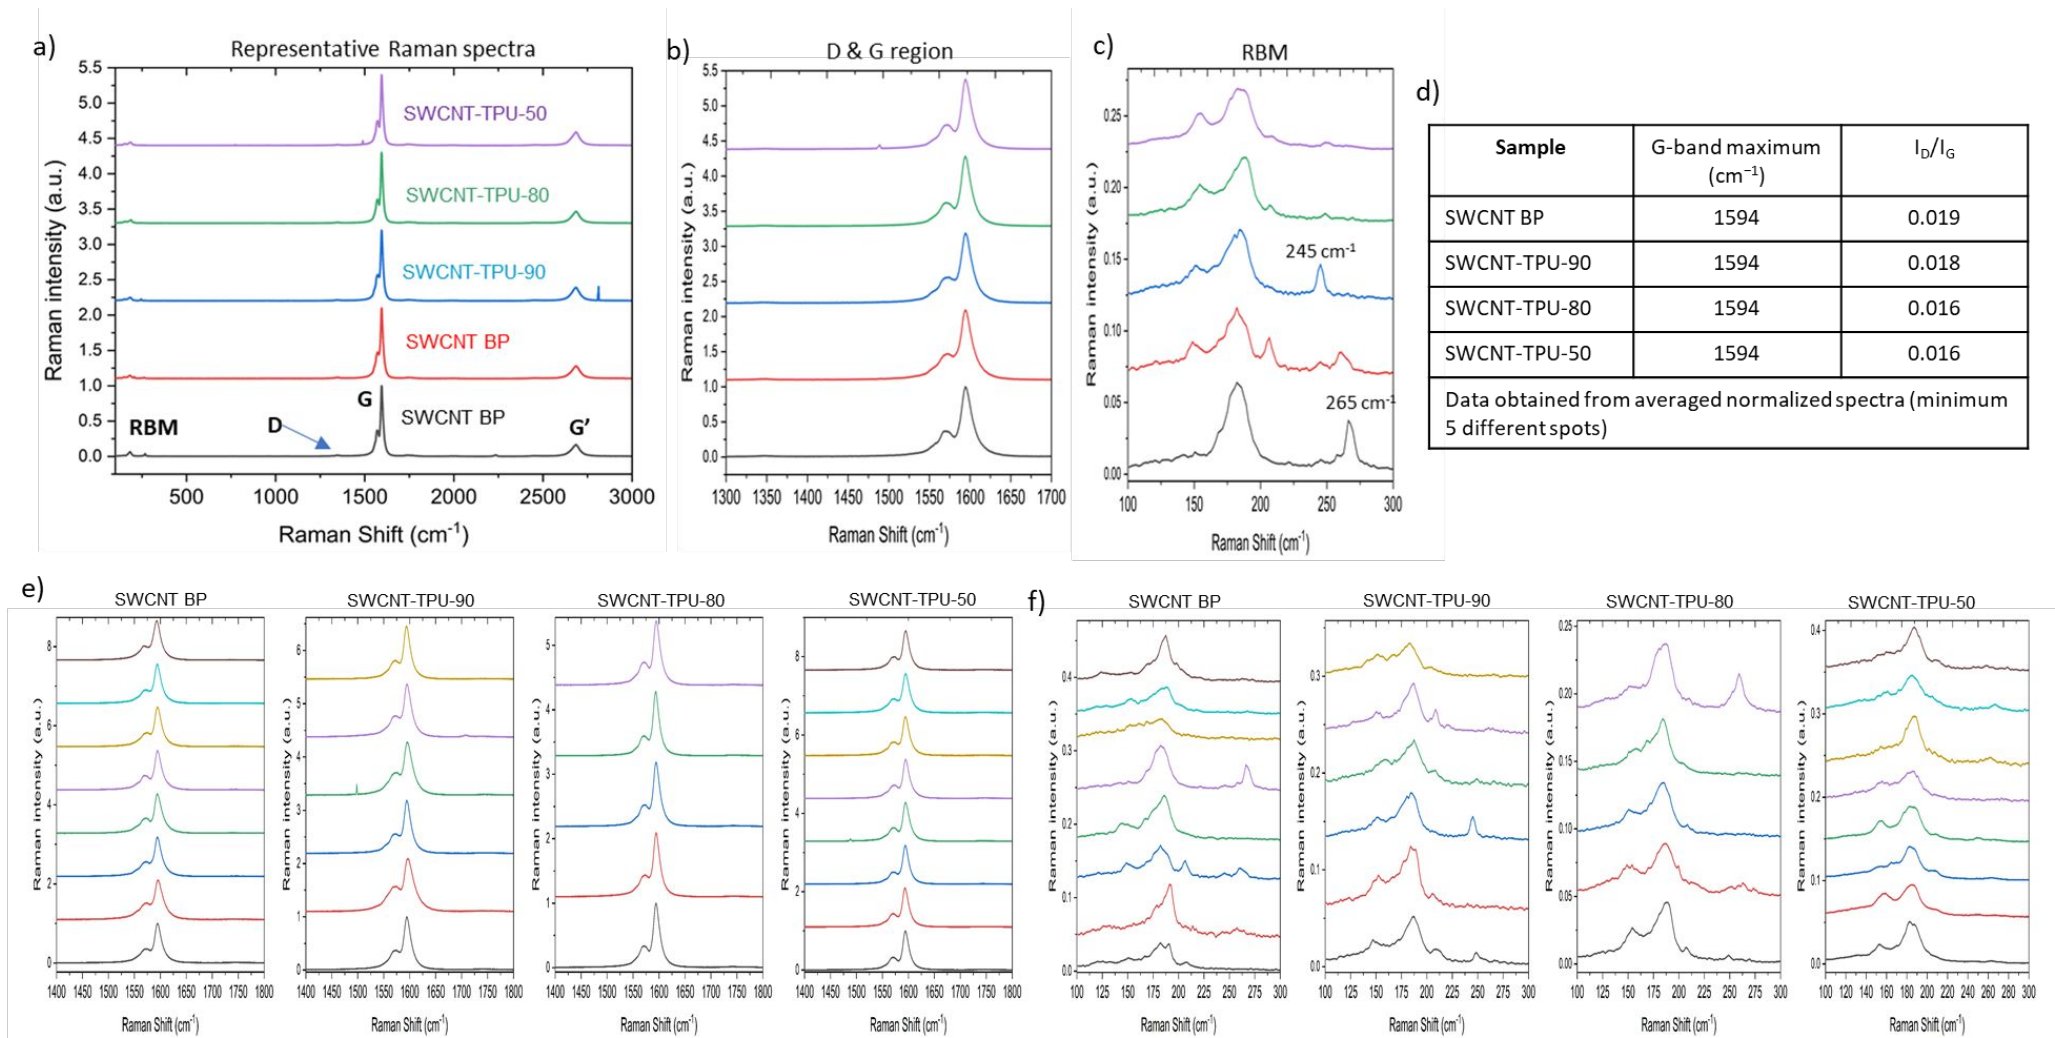

**Figure S4.** Characterization of SWCNT buckypaper (BP) and SWCNT-TPU nanocomposite sheets by Raman spectroscopy: Comparison of representative Raman spectra with typical RBM, G, D, and G' bands for SWCNT (a) with zoomed region showing D & G band region (b) and RBM region (c). (d) shows summary of G-band maximum position and I<sub>D</sub>/I<sub>G</sub>. (e) and (f) show the G and RBM regions, respectively, for all individual spectra measured at multiple spots on each sample.



**Table S2.** Recent advances in thermoelectric properties of carbon nanotube/TPU based composites based on literature reports

| Sample                                      | Filler                               | Content                                    | Processing                                 | $\sigma$                 | S                           | PF                                           | ZT                                                                               | E                         | $\sigma_{fail}$        | $\epsilon_{fai}$<br>1  | Ref.             |
|---------------------------------------------|--------------------------------------|--------------------------------------------|--------------------------------------------|--------------------------|-----------------------------|----------------------------------------------|----------------------------------------------------------------------------------|---------------------------|------------------------|------------------------|------------------|
|                                             |                                      | (wt%)                                      |                                            | (S cm <sup>-1</sup> )    | ( $\mu$ V K <sup>-1</sup> ) | ( $\mu$ W·m <sup>-1</sup> ·K <sup>-2</sup> ) | (-)                                                                              | (MPa)                     | (MPa)                  | (%)                    |                  |
| MWCNT/PEDOT:PSS/PU                          | MWCNT CoMoCAT <sup>®</sup>           | 20                                         | Solution Processing                        | 1.4                      | 10                          | 1.4                                          | –                                                                                | –                         | –                      | –                      | [2]              |
| PPBH <sup>I</sup> /SWCNT/PUBI <sup>II</sup> | SWCNT Tuball <sup>TM</sup>           | 10                                         | Drop casting                               | 110                      | 24                          | $5.2 \times 10^{-1}$                         | –                                                                                | –                         | –                      | 3.8                    | [3]              |
| PEDOT:PSS/CNT/WPU <sup>III</sup>            | SWCNT<br>Chengdu Organic Chemicals   | 50                                         | Drop casting                               | 19                       | 31                          | –                                            | –                                                                                | –                         | –                      | 400                    | [4]              |
| MWCNT/TPU                                   | MWCNT Nanocyl <sup>®</sup><br>NC7000 | 5                                          | Melt Mixing                                | 0.45                     | 8.5                         | $4 \times 10^{-3}$                           | –                                                                                | 25                        | 9.5                    | 154                    | [5]              |
| MWCNT/TPU                                   | L-MWCNT Nanocyl <sup>®</sup>         | 5                                          | Melt Mixing                                | 0.94                     | 18.5                        | $4 \times 10^{-2}$                           | $1.42 \times 10^{-5}$                                                            | 28.5                      | 10.4                   | 161                    | [5]              |
| MWCNT/PVA <sup>IV</sup> /PU                 | MWCNT<br>Chengdu Organic Chemicals   |                                            | Wet Spinning                               | 4                        | 17                          | $1.16 \times 10^{-1}$                        | –                                                                                | –                         | –                      | –                      | [6]              |
| SWCNT/PVA/PU                                | SWCNT<br>Chengdu Organic Chemicals   |                                            | Wet Spinning                               | 10                       | 19                          | $3.6 \times 10^{-1}$                         | –                                                                                | –                         | –                      | –                      | [6]              |
| SWCNT/PVA/PU                                | SWCNT<br>Nanjing XFNANO Materials    |                                            | Wet Spinning                               | 9                        | 38                          | 1.3                                          | –                                                                                | –                         | –                      | –                      | [6]              |
| PEDOT:PSS/CNT/PCL <sup>V</sup> /<br>PU      | SWCNT<br>Chengdu Organic Chemicals   | 7:3<br>(PEDOT:PSS)<br>:(SWCNT)             | Electro-spinning and filtration            | 16                       | 35                          | 1.9                                          | –                                                                                | –                         | –                      | 400                    | [7]              |
| Graphene/CNF <sup>VI</sup> /TPU             |                                      |                                            | Direct Ink Writing                         | –                        | 30.8                        | –                                            | –                                                                                | –                         | –                      | –                      | [8]              |
| SWCNT/PVP <sup>VII</sup> /PU                | SWCNT<br>Chengdu Organic Chemicals   | 7:3<br>(SWCNT):<br>(PVP)                   | Electrospinning/Spray Technology           | 20                       | 51                          | 5                                            | –                                                                                | –                         | –                      | 250                    | [9]              |
| <b>SWCNT/TPU</b>                            | <b>SWCNT Tuball<sup>TM</sup></b>     | <b>50 (15 vol%)</b><br><b>90 (16 vol%)</b> | <b>Solution Mixing/one step filtration</b> | <b>133</b><br><b>157</b> | <b>65.5</b><br><b>64.5</b>  | <b>56.9</b><br><b>65.4</b>                   | <b><math>2.4 \times 10^{-3}</math></b><br><b><math>2.9 \times 10^{-3}</math></b> | <b>1773</b><br><b>576</b> | <b>80</b><br><b>14</b> | <b>41</b><br><b>11</b> | <b>This work</b> |

<sup>I</sup> Polymer particles bearing many small bumps and crosslinkable hydroxyl groups on their surfaces (PPBH). <sup>II</sup> A waterdispersible polyurethane with blocked terminal isocyanate groups (PUBI).

<sup>III</sup> Waterborne polyurethane. <sup>IV</sup> Poly(vinyl alcohol). <sup>V</sup> Polycaprolactone. <sup>VI</sup> Carbon nanofiber. <sup>VII</sup> Polyvinyl pyrrolidone

## References:

1. Bârsan, O.A.; Hoffmann, G.G.; van der Ven, L.G.J.; de With, G. Single-Walled Carbon Nanotube Networks: The Influence of Individual Tube–Tube Contacts on the Large-Scale Conductivity of Polymer Composites. *Advanced Functional Materials* **2016**, *26*, 4377-4385, doi:<https://doi.org/10.1002/adfm.201600435>.
2. Wu, Q.; Hu, J. Waterborne polyurethane based thermoelectric composites and their application potential in wearable thermoelectric textiles. *Composites Part B: Engineering* **2016**, *107*, 59-66, doi:<https://doi.org/10.1016/j.compositesb.2016.09.068>.
3. Xiao, C.; Xue, Y.; Liu, M.; Xu, X.; Wu, X.; Wang, Z.; Xu, Y.; Chen, G. Polymer composites with lychee-like core covered by segregated conducting and flexible networks: unique morphology, high flexibility, stretchability and thermoelectric performance. *Composites Science and Technology* **2018**, *161*, 16-21, doi:<https://doi.org/10.1016/j.compscitech.2018.03.039>.
4. He, X.; Hao, Y.; He, M.; Qin, X.; Wang, L.; Yu, J. Stretchable Thermoelectric-Based Self-Powered Dual-Parameter Sensors with Decoupled Temperature and Strain Sensing. *ACS Applied Materials & Interfaces* **2021**, *13*, 60498-60507, doi:10.1021/acsami.1c20456.
5. Tzounis, L.; Petousis, M.; Grammatikos, S.; Vidakis, N. 3D Printed Thermoelectric Polyurethane/Multiwalled Carbon Nanotube Nanocomposites: A Novel Approach towards the Fabrication of Flexible and Stretchable Organic Thermoelectrics. *Materials* **2020**, *13*, 2879.
6. Zhang, C.; Zhang, Q.; Zhang, D.; Wang, M.; Bo, Y.; Fan, X.; Li, F.; Liang, J.; Huang, Y.; Ma, R.; et al. Highly Stretchable Carbon Nanotubes/Polymer Thermoelectric Fibers. *Nano Letters* **2021**, *21*, 1047-1055, doi:10.1021/acs.nanolett.0c04252.
7. He, X.; Shi, J.; Hao, Y.; Wang, L.; Qin, X.; Yu, J. PEDOT:PSS/CNT composites based ultra-stretchable thermoelectrics and their application as strain sensors. *Composites Communications* **2021**, *27*, 100822, doi:<https://doi.org/10.1016/j.coco.2021.100822>.
8. Yin, Y.; Wang, Y.; Li, H.; Xu, J.; Zhang, C.; Li, X.; Cao, J.; Feng, H.; Zhu, G. A flexible dual parameter sensor with hierarchical porous structure for fully decoupled pressure–temperature sensing. *Chemical Engineering Journal* **2022**, *430*, 133158, doi:<https://doi.org/10.1016/j.cej.2021.133158>.
9. He, X.; Shi, J.; Hao, Y.; He, M.; Cai, J.; Qin, X.; Wang, L.; Yu, J. Highly stretchable, durable, and breathable thermoelectric fabrics for human body energy harvesting and sensing. *Carbon Energy* **2022**, *4*, 621-632, doi:<https://doi.org/10.1002/cey2.186>.
